# Supplementary material for: Childhood Adversity, Benevolent Experiences, and Perceived Stress Among Pregnant Women in Mexico: Psychosocial Determinants of Maternal Well-Being in a Middle-Income Setting
Source: Research Square preprint supplement (doi:10.21203/rs.3.rs-8484248/v1), 2026-01-22
Supplement: Supplementary file 1 [file c2982d30546aa390383efb6d.docx]

**STROBE Checklist for Cross-Sectional Studies**

| **Item No.** | **STROBE Recommendation** | **Reported on Page(s)** |
| --- | --- | --- |
| **Title and abstract** |  |  |
| 1a | Indicate the study’s design with a commonly used term in the title or abstract | Title; Abstract |
| 1b | Provide an informative and balanced summary of what was done and what was found | Abstract |
| **Introduction** |  |  |
| 2 | Explain the scientific background and rationale for the investigation | Background |
| 3 | State specific objectives, including any prespecified hypotheses | Background |
| **Methods** |  |  |
| 4 | Present key elements of study design early in the paper | Methods – Study design |
| 5 | Describe the setting, locations, and relevant dates | Methods – Study setting |
| 6 | Give eligibility criteria and sources and methods of selection of participants | Methods – Participants |
| 7 | Clearly define all outcomes, exposures, predictors, confounders, and effect modifiers | Methods – Measures |
| 8* | Give sources of data and details of methods of assessment | Methods – Measures |
| 9 | Describe any efforts to address potential sources of bias | Methods – Procedures; Limitations |
| 10 | Explain how the study size was arrived at | Methods – Sample size |
| 11 | Explain how quantitative variables were handled in the analyses | Methods – Statistical analysis |
| **Statistical methods** |  |  |
| 12a | Describe all statistical methods, including those used to control for confounding | Methods – Statistical analysis |
| 12b | Describe methods used to examine subgroups and interactions | Methods – Statistical analysis |
| 12c | Explain how missing data were addressed | Methods – Missing data |
| 12d | If applicable, describe analytical methods taking account of sampling strategy | Not applicable |
| 12e | Describe any sensitivity analyses | Not applicable |
| **Results** |  |  |
| 13a | Report numbers of individuals at each stage of the study | Results; Figure 1 |
| 13b | Give reasons for non-participation at each stage | Results; Figure 1 |
| 13c | Consider use of a flow diagram | Figure 1 |
| 14a | Give characteristics of study participants | Results; Table 1 |
| 14b | Indicate number of participants with missing data for each variable of interest | Results |
| 15 | Report numbers of outcome events or summary measures | Results; Tables 2–3 |
| 16a | Give unadjusted estimates and, if applicable, confounder-adjusted estimates | Results |
| 16b | Report category boundaries when continuous variables were categorized | Results |
| 16c | If relevant, consider translating estimates into absolute risk | Not applicable |
| **Other analyses** |  |  |
| 17 | Report other analyses done (e.g., SEM) | Results; Figure 4 |
| **Discussion** |  |  |
| 18 | Summarize key results with reference to study objectives | Discussion |
| 19 | Discuss limitations of the study | Discussion – Strengths and limitations |
| 20 | Give a cautious overall interpretation of results | Discussion |
| 21 | Discuss the generalizability of the study results | Discussion |
| **Other information** |  |  |
| 22 | Give the source of funding and role of funders | Declarations – Funding |
